# Supplementary material
Source: Springer Nature journal article supplement (https://www.springermedizin.de/resource/supplementary/12958_2012_1057_MOESM2_ESM.pdf/9566826)

Antibody

Antibody+peptide

Ang-(1-7)

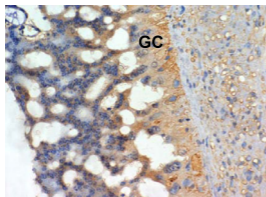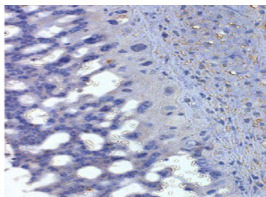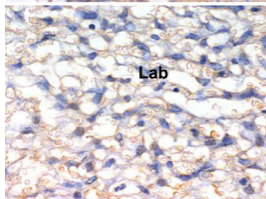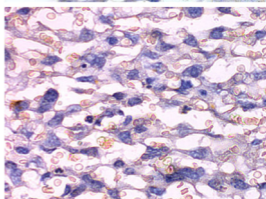

ACE2

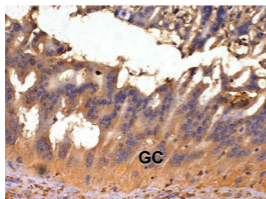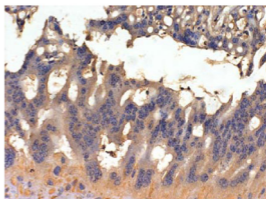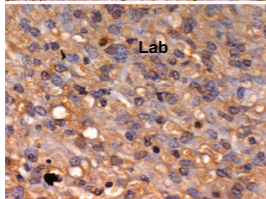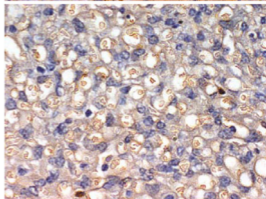

Supplement: MOESM2 [file 9566826]
